# Supplementary figures and images for: Age-Dependent Activation of Purinergic Transmission Contributes to the Development of Epileptogenesis in ADSHE Model Rats
Source: MDPI journal article supplement (doi:10.3390/biom14020204), 2024-02-08

Fig5-GAPDH

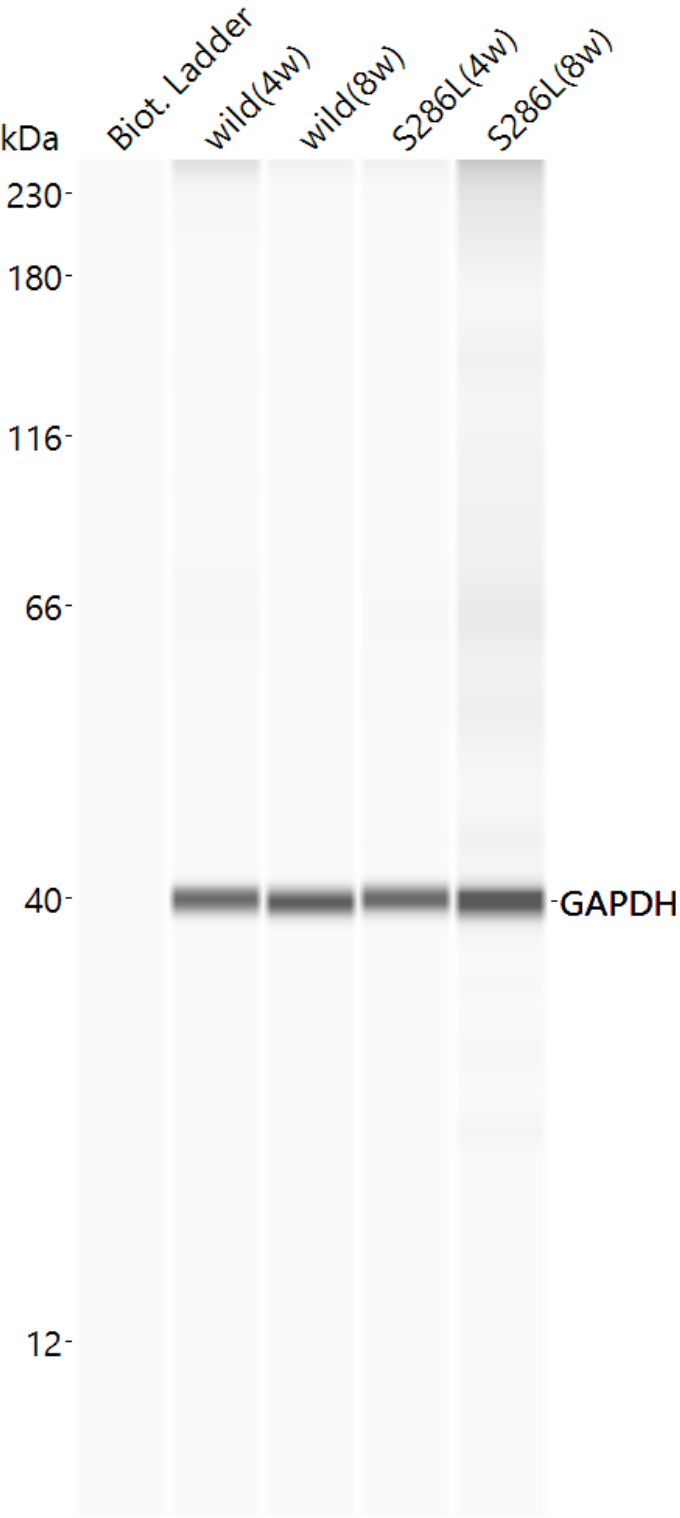

Fig5-P2X7

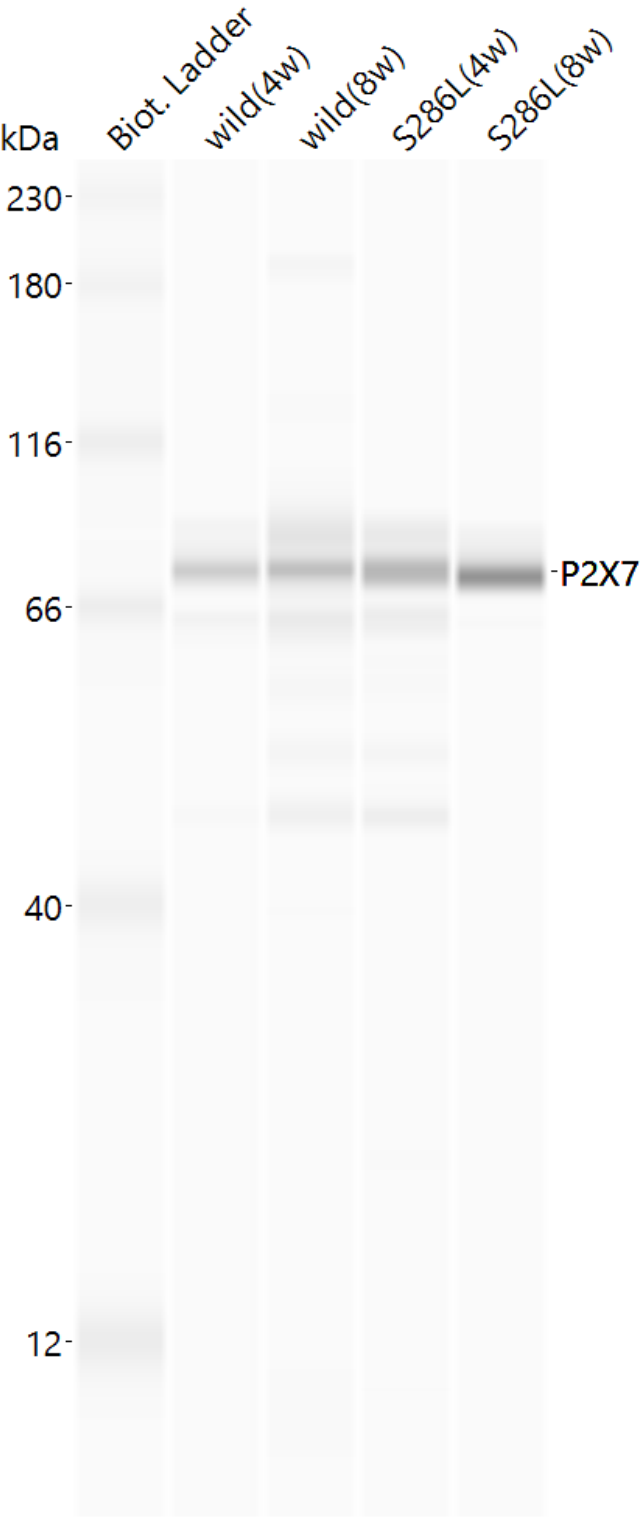

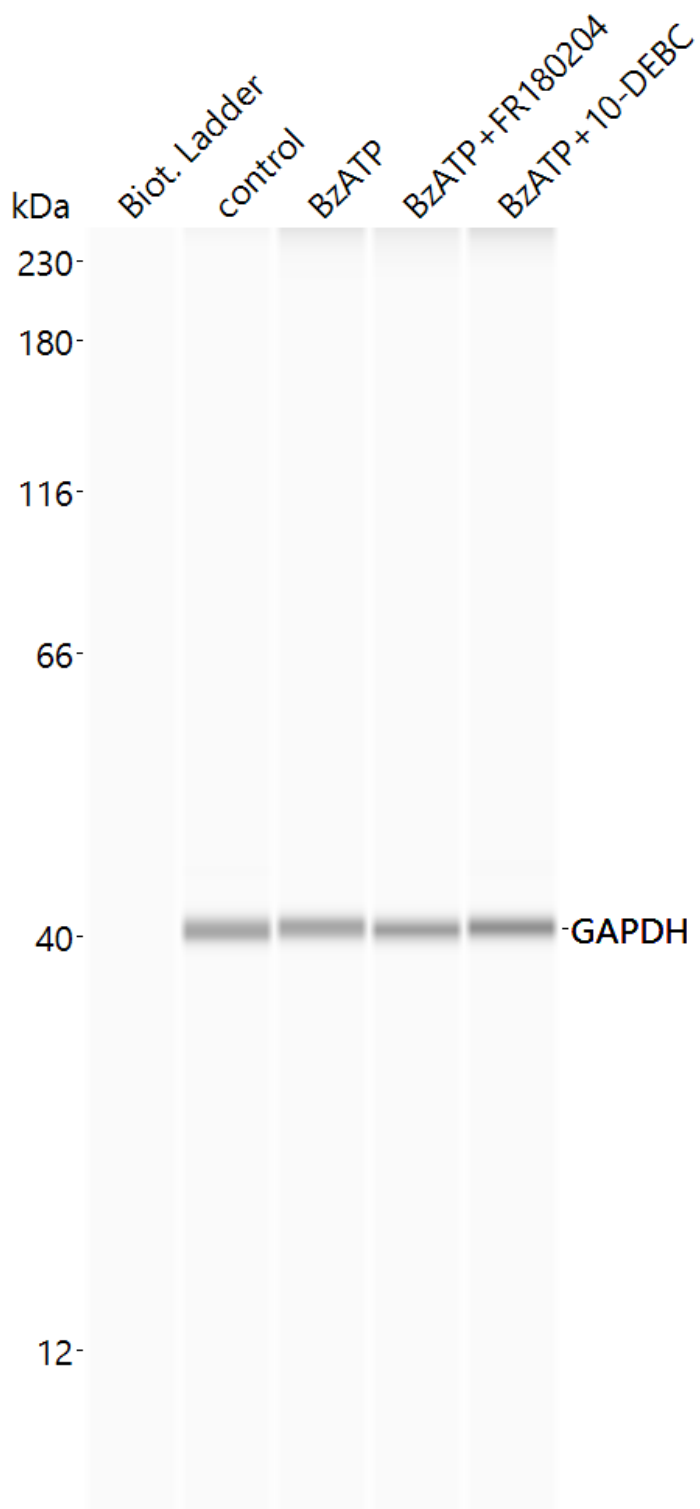

Fig8A-P2X7

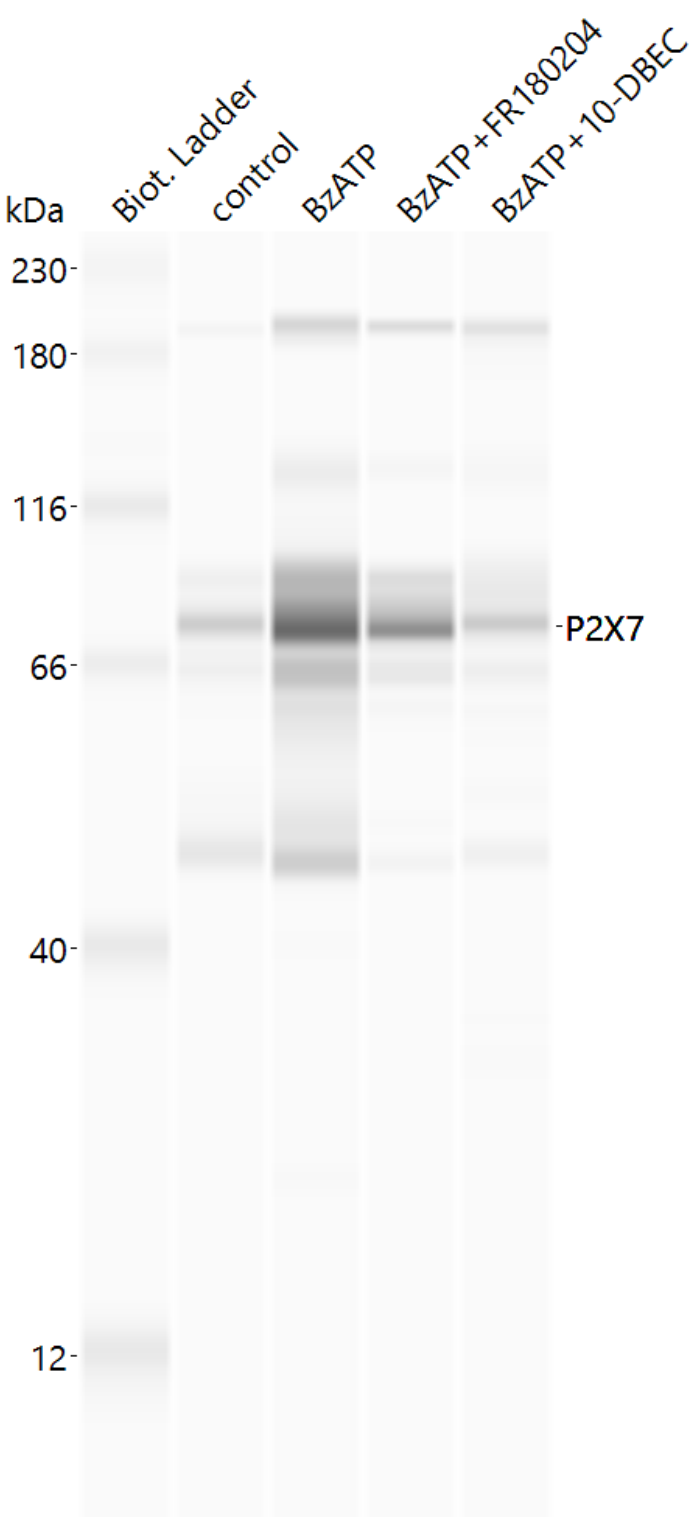

Fig8B-GAPDH

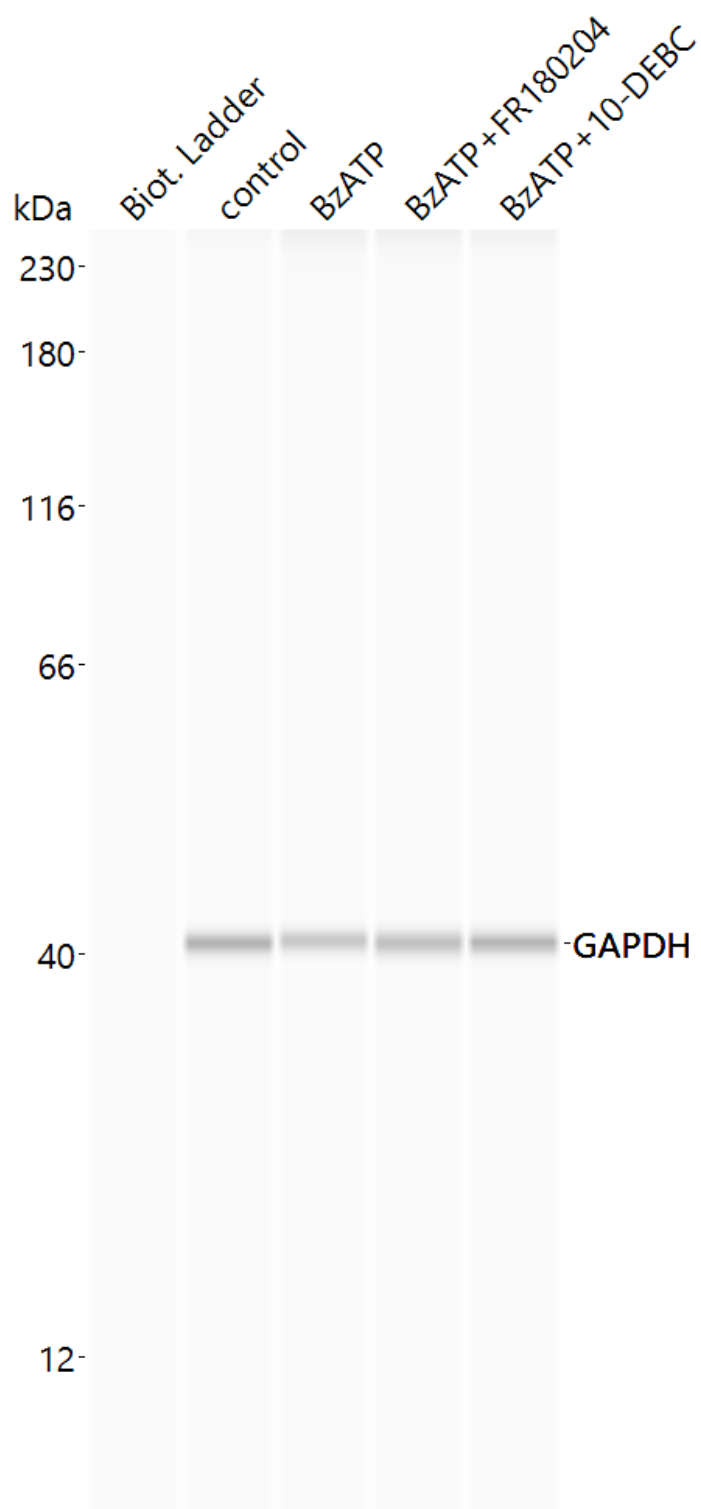

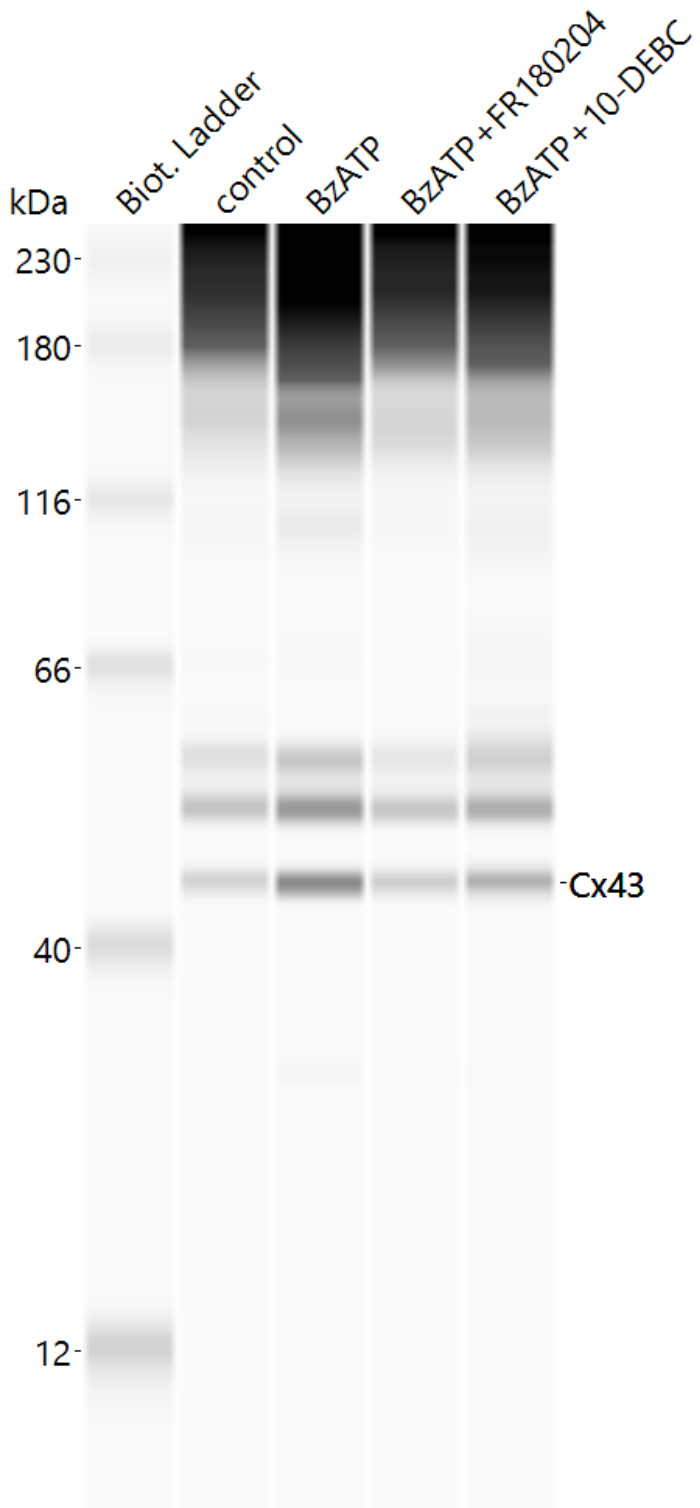

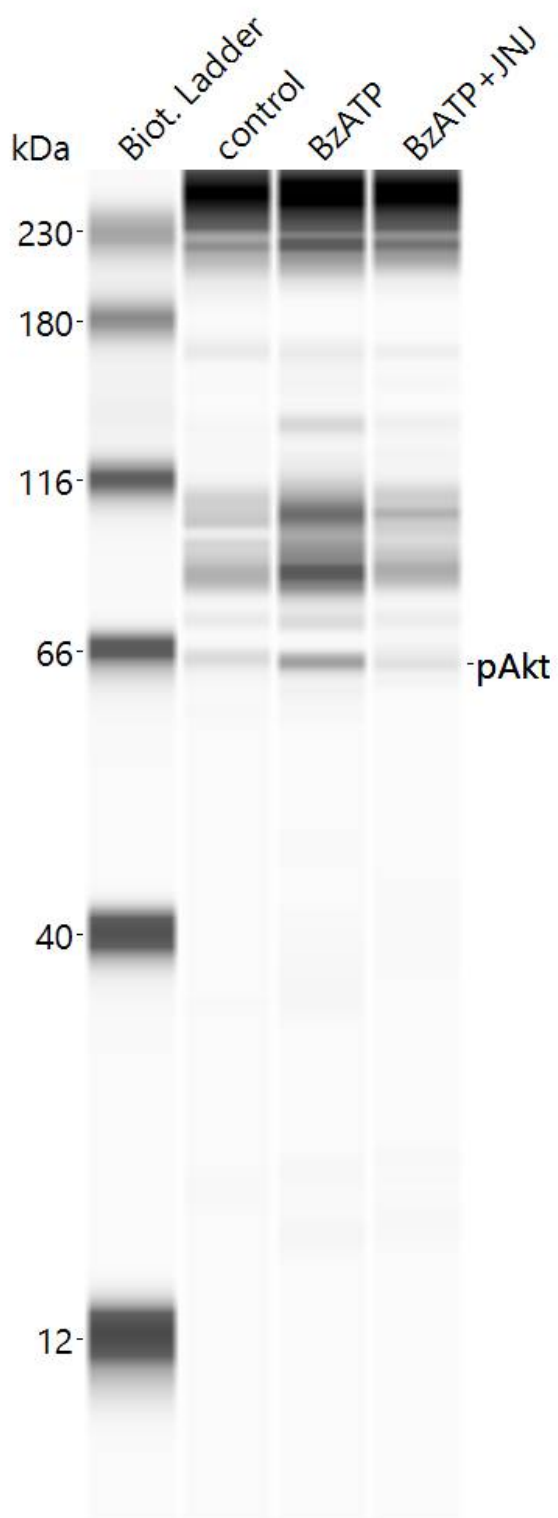

Fig8C-Akt (kinase)

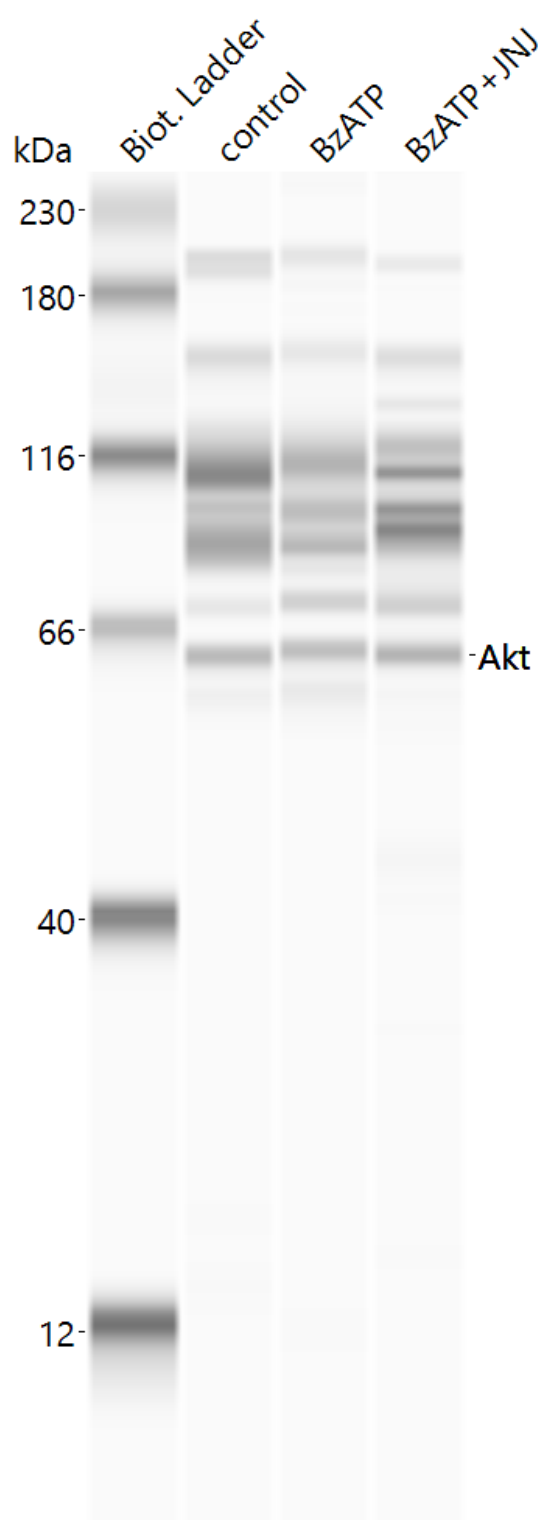



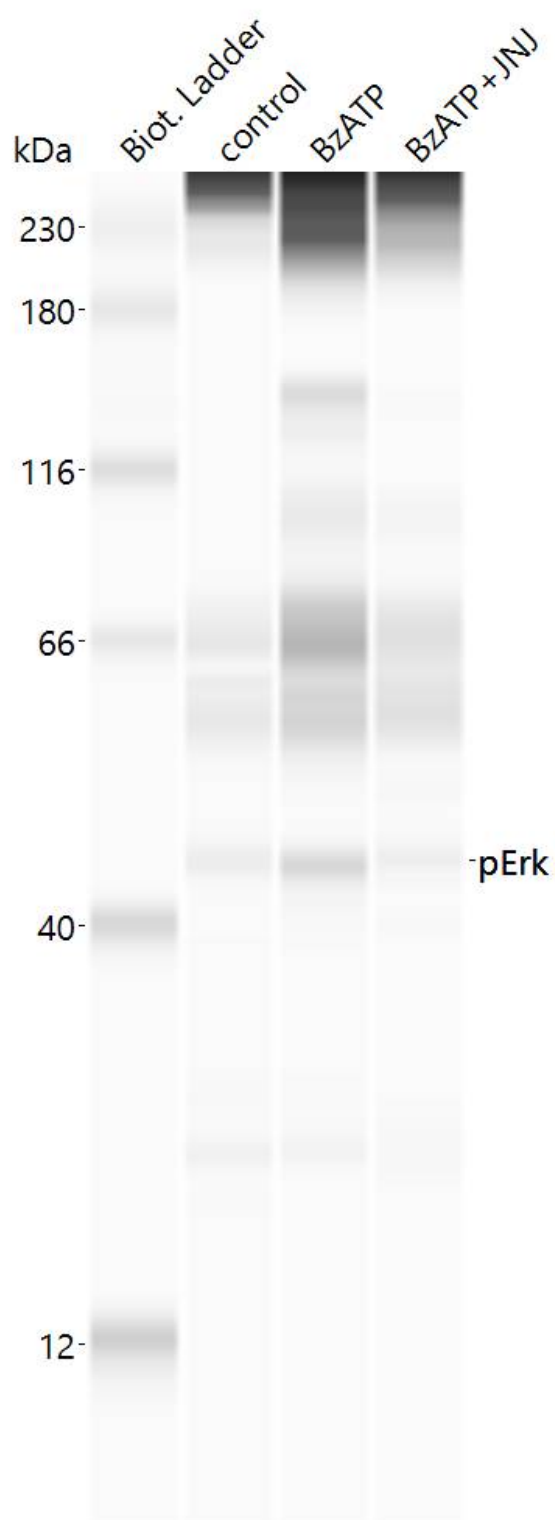

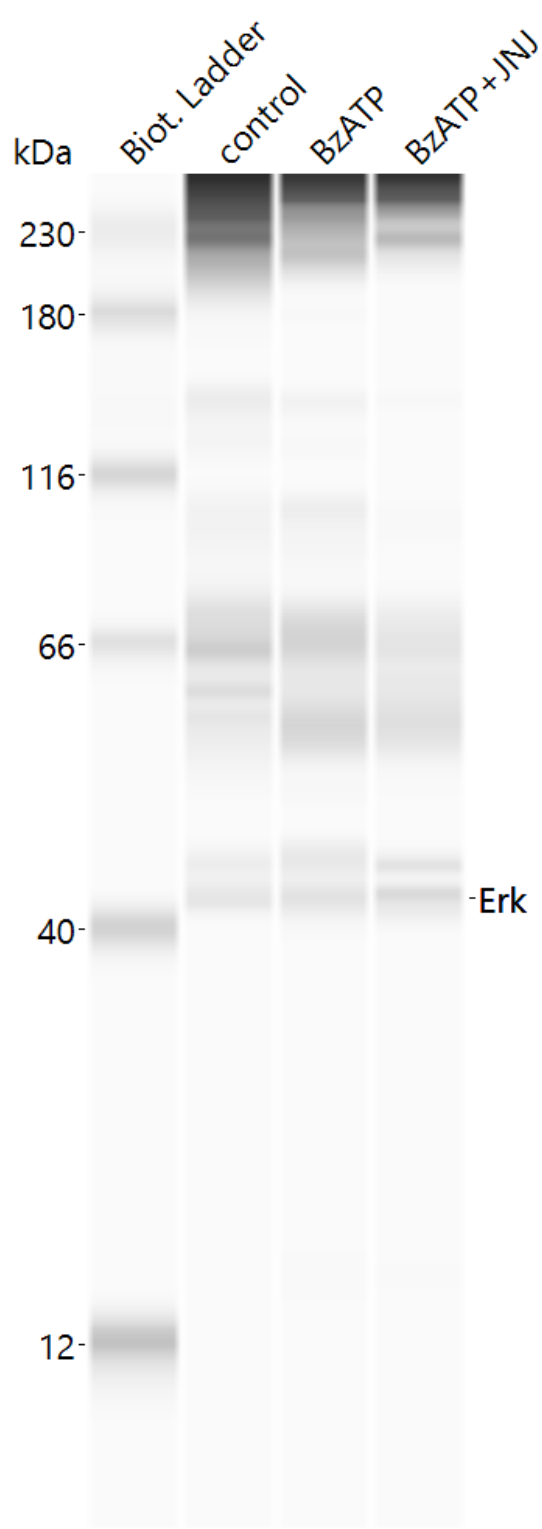

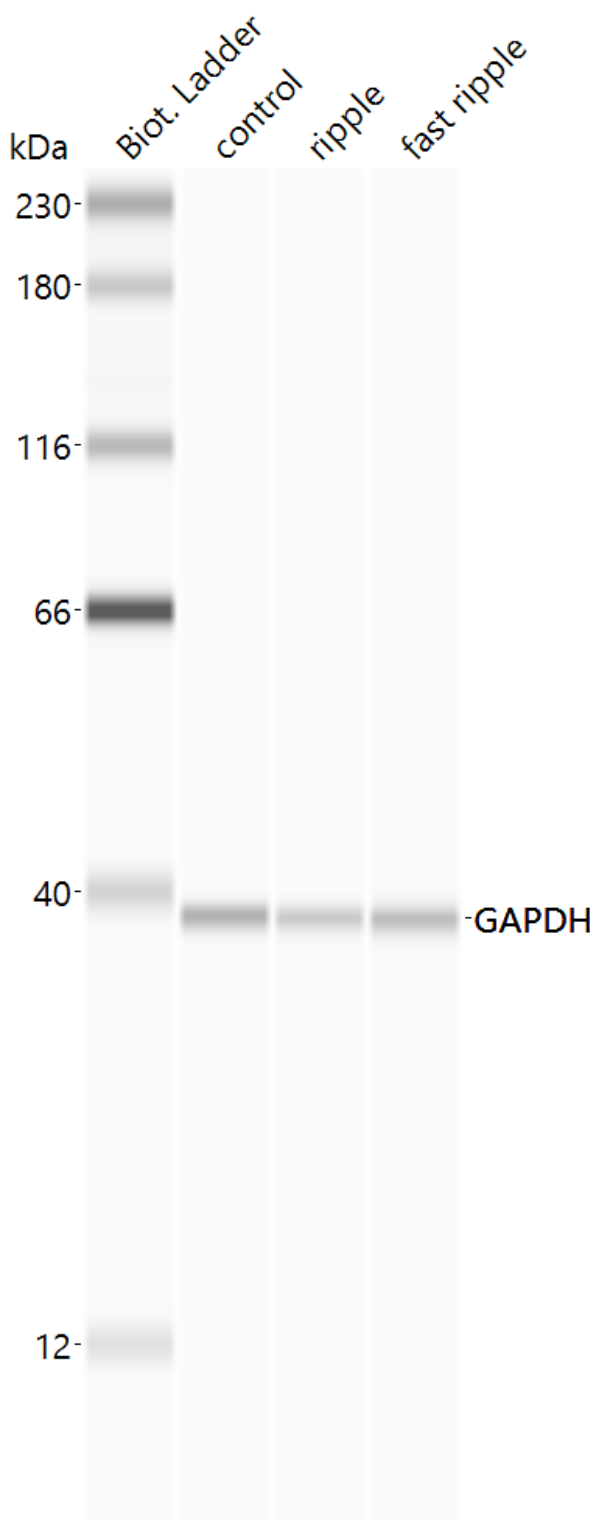

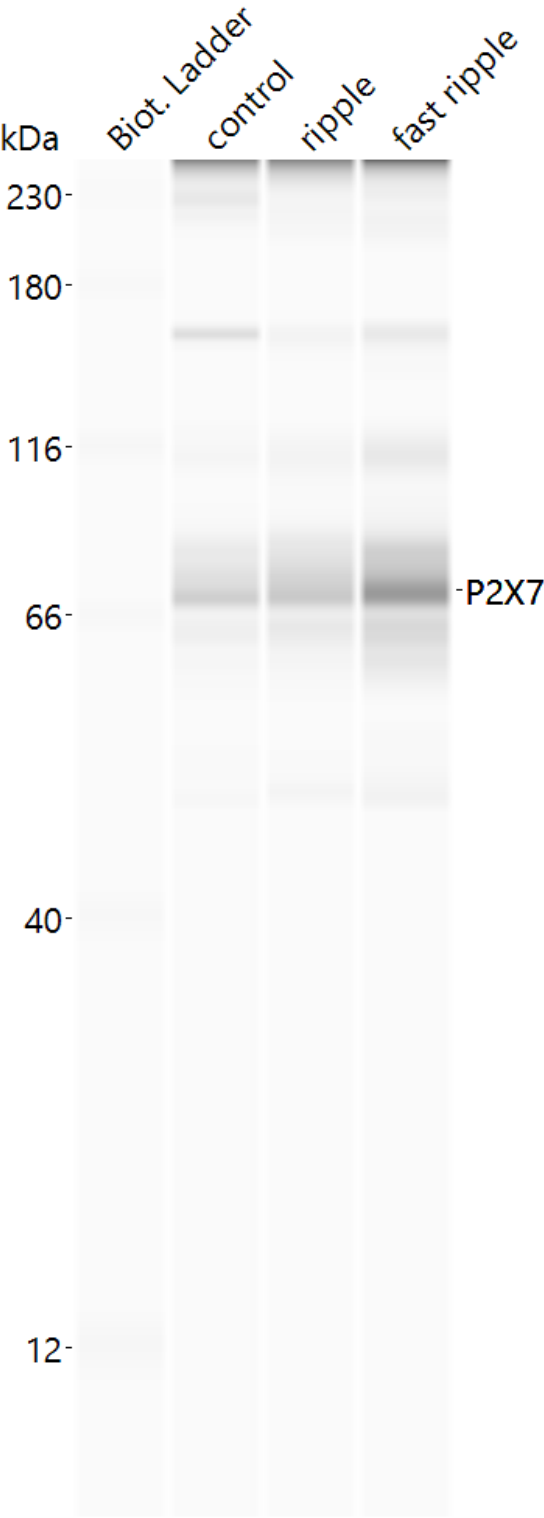

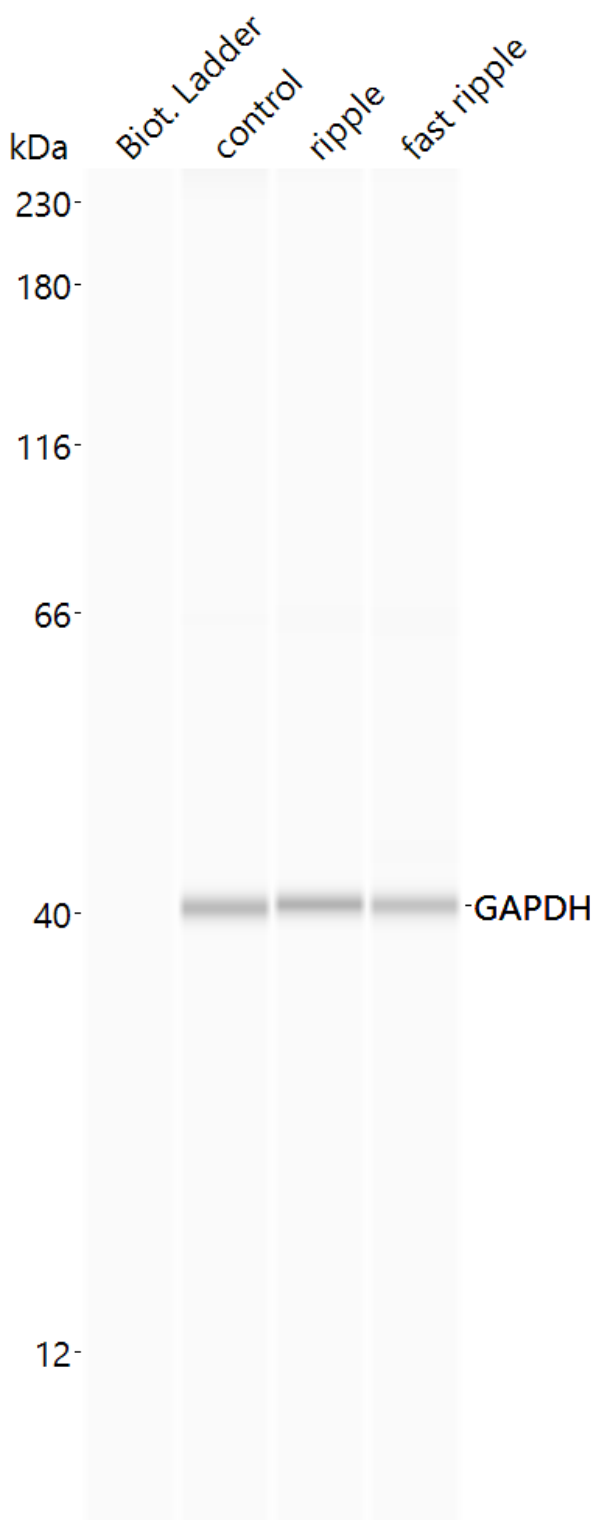

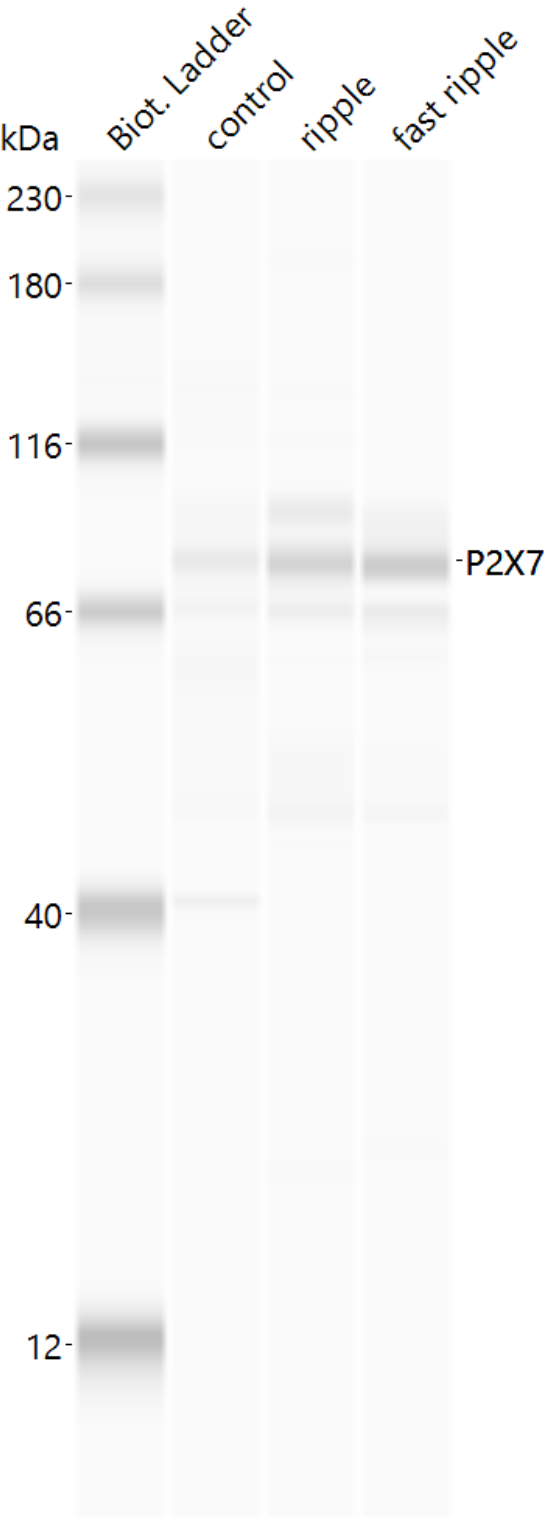

Supplement: s1 [file s1]
